# Supplementary material for: Biomass-derived solar-to-thermal materials: promising energy absorbers to convert light to mechanical motion
Source: Royal Society of Chemistry journal article supplement (doi:10.1039/c8ta11199e), 2019-01-01
Supplement: c8ta11199e1.pdf [file c8ta11199e1.pdf]

## Supporting Information

### **Biomass-derived solar-to-thermal materials: promising energy absorbers to convert light to mechanical motion**

Xiongfei Luo, Chunhui Ma, Zhijun Chen,\* Xinyue Zhang, Na Niu, Jian Li, Shouxin

Liu and Shujun Li\*

Key Laboratory of Bio-based Material Science and Technology of Ministry of  
Education, Northeast Forestry University, Hexing Road 26, Harbin 150040, P.R.  
China.

\*E-mail address: chenzhijun@nefu.edu.cn (Z. Chen), lishujun\_1999@126.com (S.  
Li).

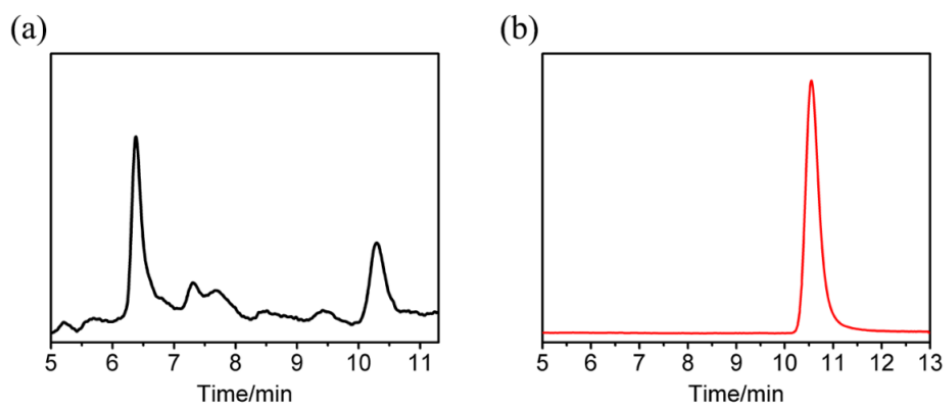

Figure S1. HPLC chromatograms of (a) LBE and (b) catechin

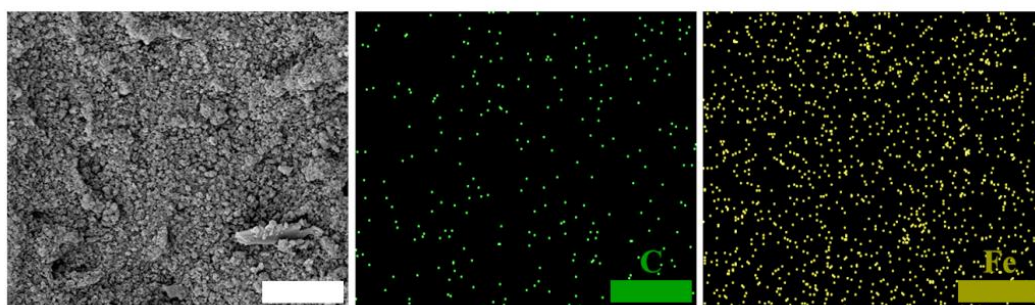

Figure S2. SEM image of LBF (left) and elemental mapping (middle and right), scale bar = 20  $\mu\text{m}$

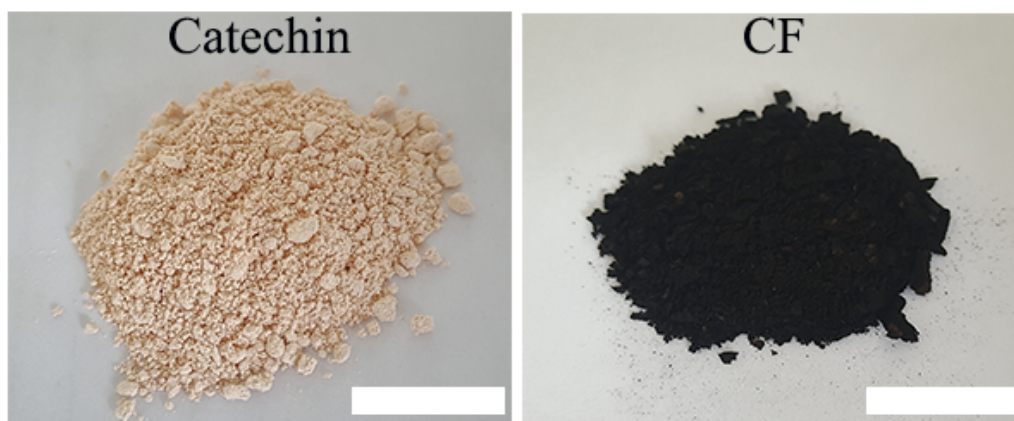

Figure S3. Images of catechin and CF, scale bar = 1 cm

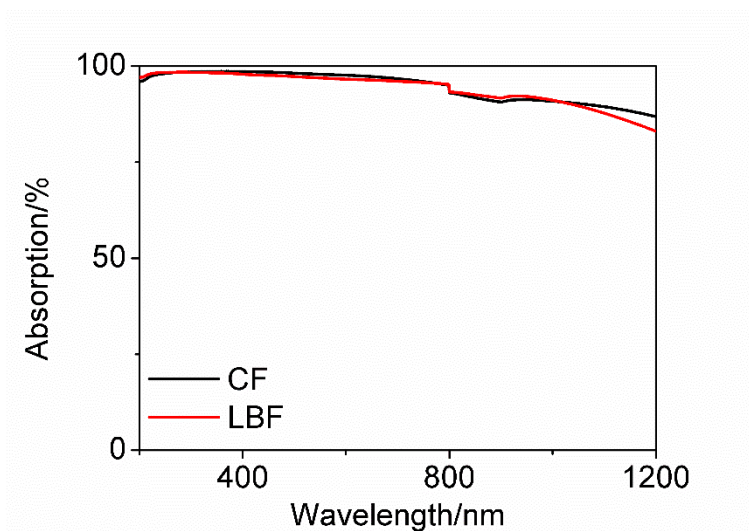

Figure S4. UV-vis-NIR spectra of CF and LBF

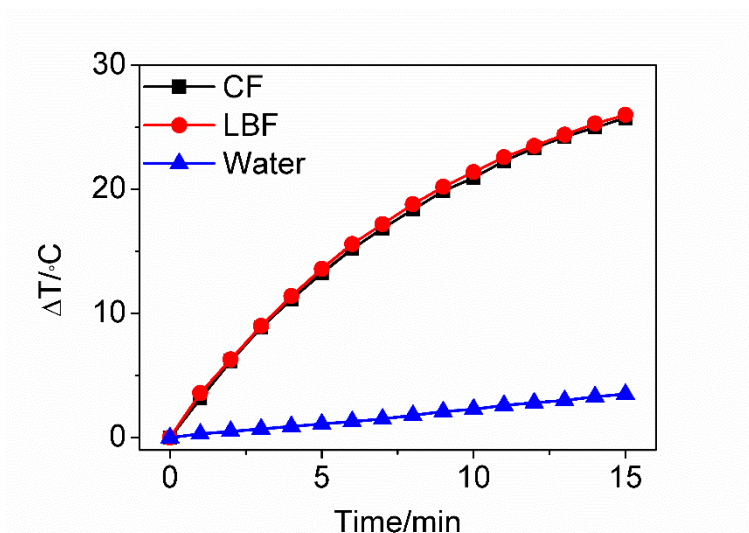

Figure S5. Photothermal heating curves of pure water, LBF and CF (1mg/mL) under standard 1 sun irradiation

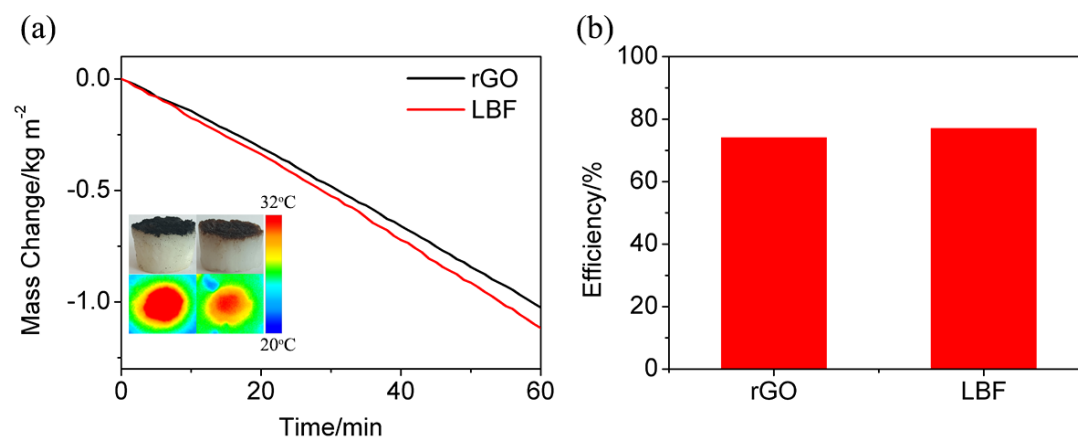

Figure S6. a) Mass change of water over time. Inset: Images of CNF/PVA aerogel

decorated with LBF film (left) and rGO film (right), top; IR mages of CNF/PVA aerogel decorated with LBF film (left) and rGO (right) in the water upon 1 standard solar irradiation, down. b) Efficiency of the floating system decorated with LBF film and rGO film. The evaporation efficiency is given by following equation<sup>1</sup>

$$\eta = \frac{\dot{m}h_{LV}}{C_{opt}q_i}$$

Where  $\dot{m}$  is the evaporation rate,  $h_{LV}$  is the total enthalpy including both sensible heat and phase change of liquid to water,  $C_{opt}$  is the optical concentration and  $q_i$  is the normal solar irradiation ( $1\text{kw m}^{-2}$ ).

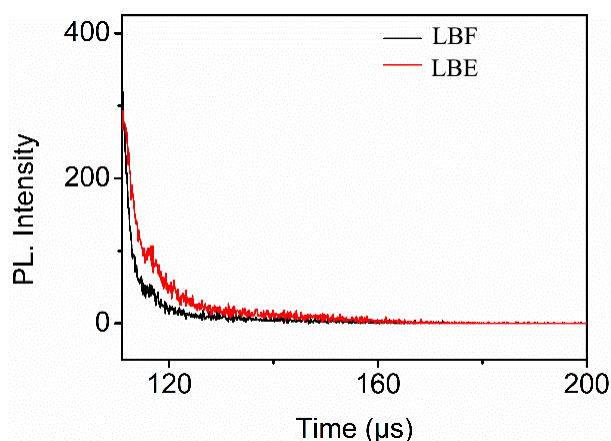

Figure S7. Fluorescence lifetime of LBE and LBF (excitation wavelength = 380 nm).

$$\tau = \frac{1}{k_f + \Sigma k} \quad \text{Equation. S1}$$

$$Y_f = \frac{k_f}{k_f + \Sigma k} \quad \text{Equation. S2}$$

Where  $\tau$  is the fluorescence lifetime and  $Y_f$  is the quantum yield. Values of  $\tau$  and  $Y_f$  were calculated using the radiative constant ( $k_f$ ) and the non-radiative constant ( $\Sigma k$ ).

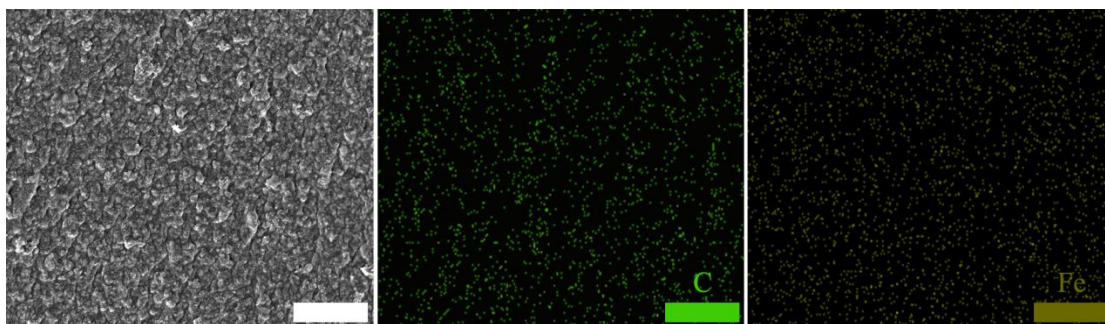

Figure S8. SEM images of 80% LBF/PVA film (left) and elemental mapping (middle and right), scale bar = 50  $\mu\text{m}$

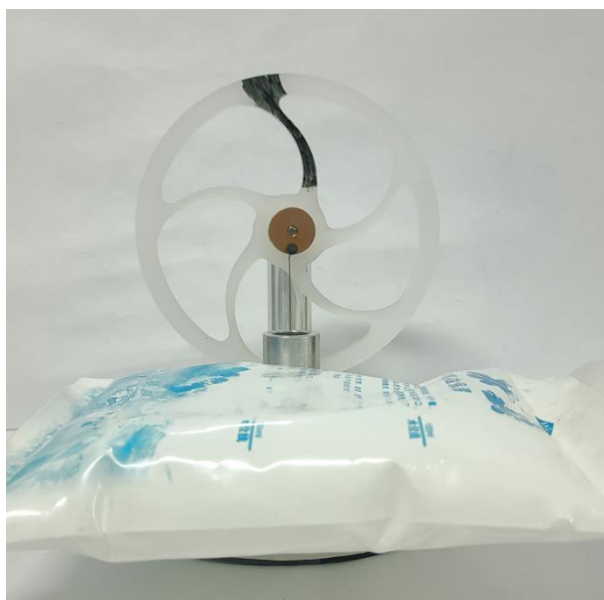

Figure S9. Images of Stirling engine decorated with LBF/PVA composite film (50% LBF) in the presence of cooling bag.

Video S1. Stirling engine treated with LBF/PVA composite film under irradiation.

Video S2. Stirling engine treated with pure PVA film under irradiation.

## References

1. H. Liu, C. Chen, G. Chen, Y. Kuang, X. Zhao, J. Song, C. Jia, X. Xu, E. Hitz and H. Xie, *Adv. Energy Mater.*, 2018, 8, 1701616.
